# Supplementary material for: Solution processable carbazole-benzophenone derivatives as bipolar hosts enabling high-efficiency stable green TADF organic LEDs
Source: Royal Society of Chemistry journal article supplement (doi:10.1039/d2tc04820e), 2023-01-01
Supplement: d2tc04820e1.pdf [file d2tc04820e1.pdf]

## Supporting Information

### **Solution Processable Carbazole-Benzophenone Derivatives Bipolar Hosts Enabling Highly-efficient Green TADF Organic LEDs**

Mangey Ram Nagar<sup>1</sup>, Krishan Kumar<sup>3</sup>, Dovydas Blazevicius<sup>2</sup>, Raminta Beresneviciute<sup>2</sup>, Gintare Krucaite<sup>2</sup>, Daiva Tavgeniene<sup>2</sup>, Chen Tun Hao<sup>1</sup>, Subrata Banik<sup>4</sup>, Jwo-Huei Jou<sup>1\*</sup>, and Saulius Grigalevicius<sup>2\*</sup>

<sup>1</sup>Department of Materials Science and Engineering, National Tsing Hua University, Taiwan

<sup>2</sup>Department of Polymer Chemistry and Technology, Kaunas University of Technology, Radvilenu Plentas 19, LT50254, Kaunas, Lithuania.

<sup>3</sup>School of Chemical Sciences, Indian Institute of Technology, Mandi, HP, India

<sup>4</sup>Department of Chemistry, School of Chemical and Biotechnology, SASTRA Deemed University, Thanjavur 613401, Tamil Nadu, India.

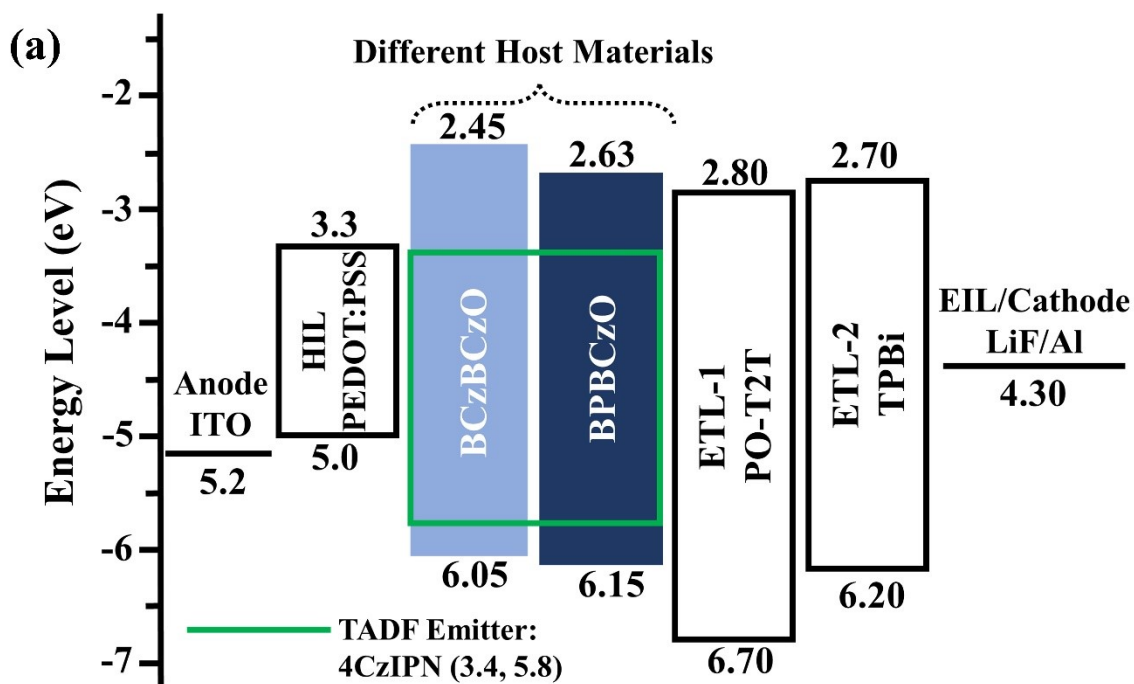

Figure S1. Energy-level diagrams of green TADF organic LEDs with newly synthesized carbazole-benzophenone derivatives, i.e. **BCzBCzO** and **BPBCzO** hosts.

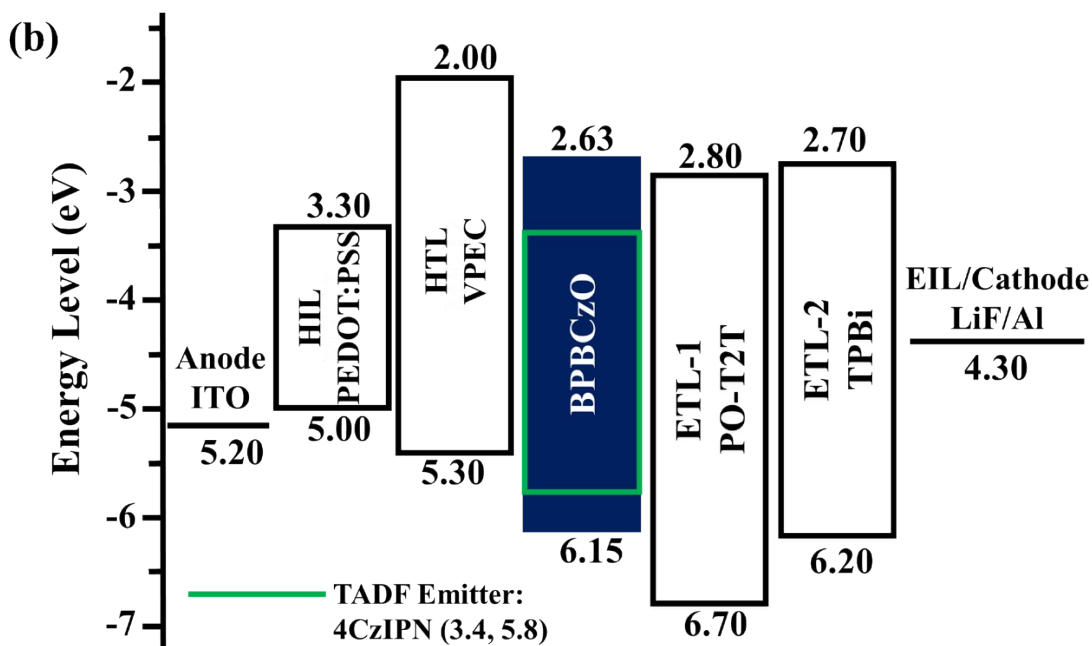

Figure S2. Energy-level diagrams of green organic LEDs (a) without and (b) with crosslinkable hole-transporting materials, i.e. VPEC, and newly synthesized carbazole-benzophenone derivatives, i.e. **BPBCzO** host.

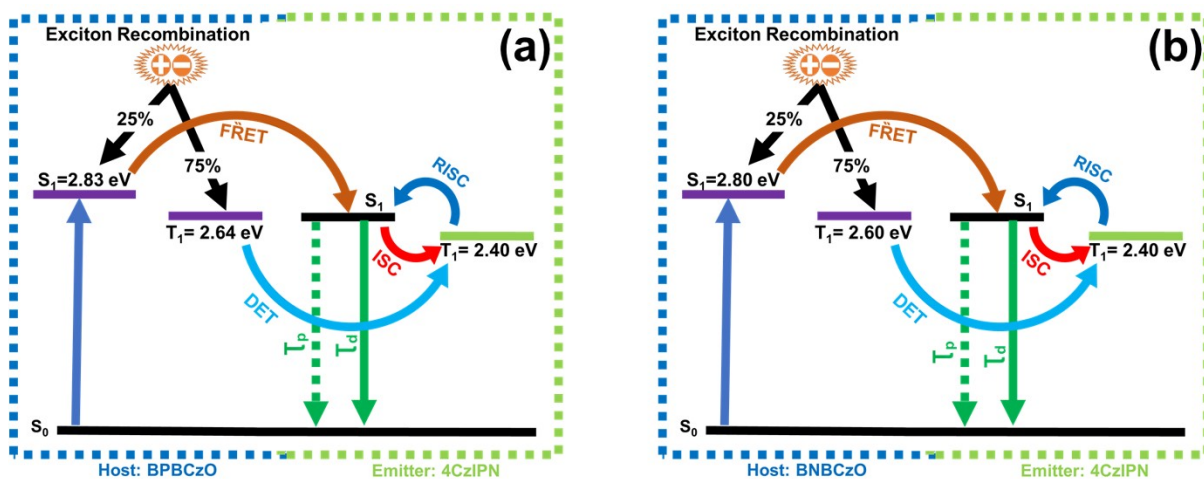

Figure S3. (a-b) Energy-transfer routes from host-to-guest in **BPBCzO** and **BCzBCzO**.

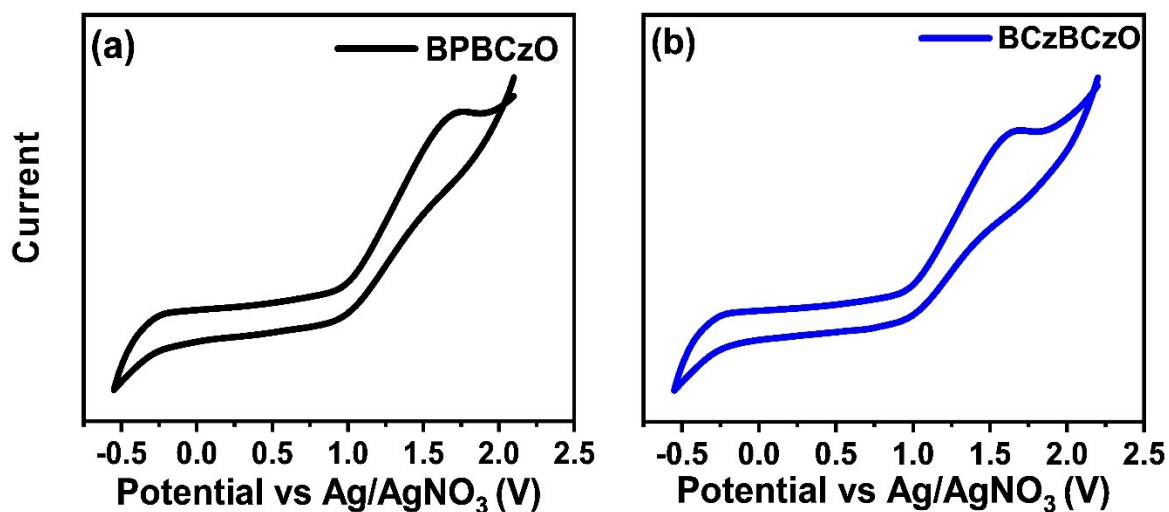

Figure S4. Cyclic voltammograms of newly synthesized carbazole-benzophenone derivatives, (a) **BPBCzO** and (c) **BCzBCzO**, were measured in DCM solution.

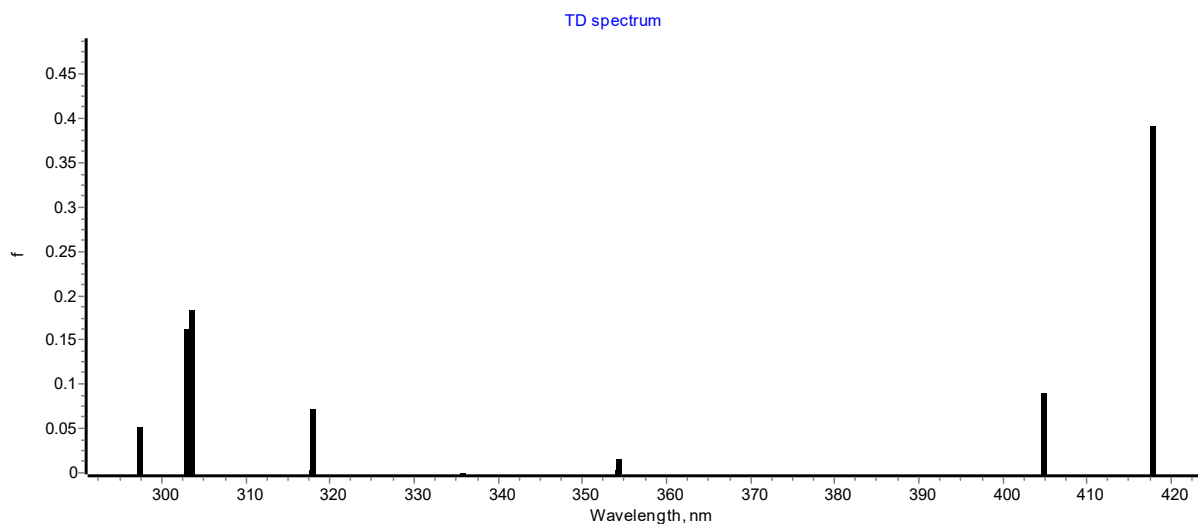

Figure S5. TD spectrum of the **BPBCzO** molecule.

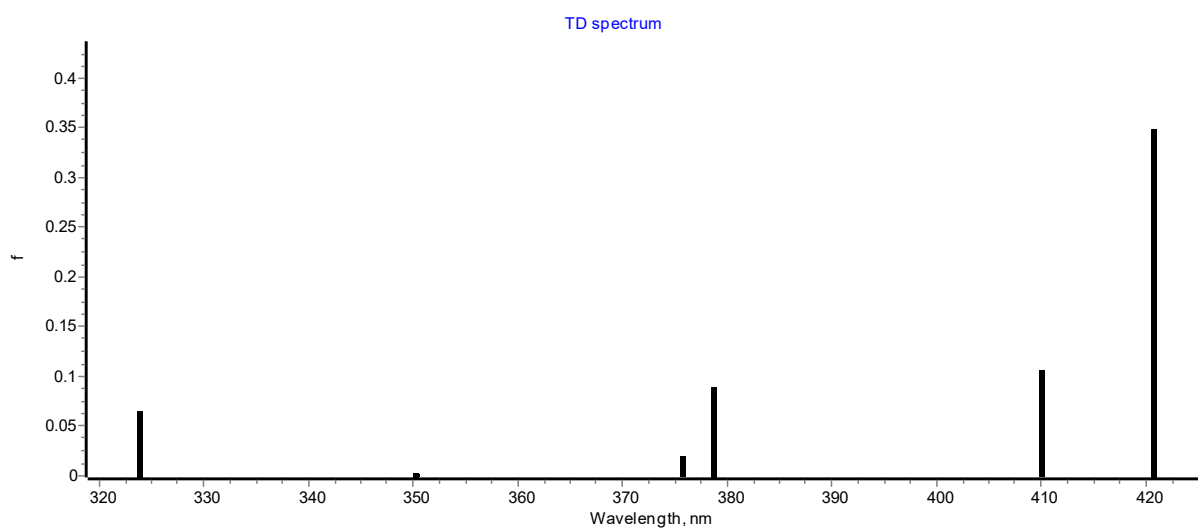

Figure S6. TD spectrum of the **BCzBCzO** molecule.

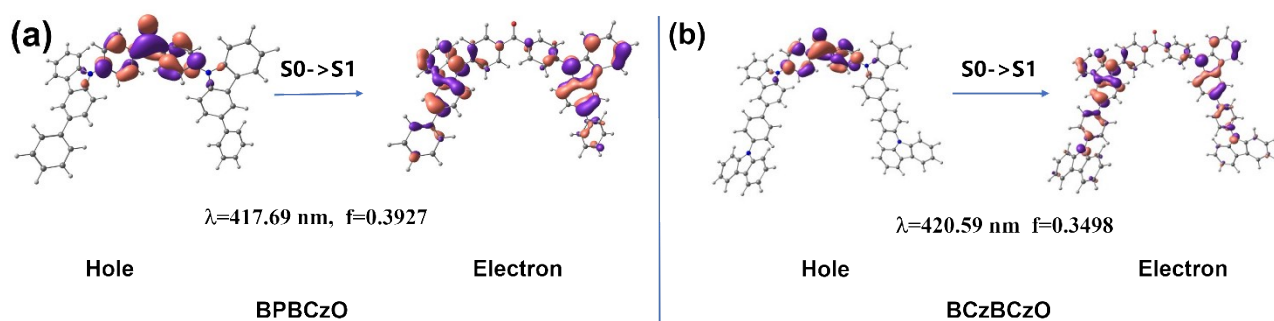

Figure S7. The NTO diagrams of  $S_0 \rightarrow S_1$  transition with their significant oscillator strengths for (a) **BPBCzO** and (b) **BCzBCzO**, respectively.

Table S1. TD-DFT analysis of **S0**->**S1** transitions (Transition energy, MO involved, and oscillator strength).

| Molecule       | Transition<br>Energy/Wavelength | Nature of transitions<br><br>MOs involved<br>Coefficients | oscillator strength<br><br>(f) |
|----------------|---------------------------------|-----------------------------------------------------------|--------------------------------|
| <b>BPBCzO</b>  | 2.9683eV/417.69 nm              | HOMO->LUMO<br><br>0.69948                                 | 0.3927                         |
| <b>BCzBCzO</b> | 2.4979 eV/420.59 nm             | HOMO->LUMO 0.62921<br>HOMO-2 ->LUMO -0.30940              | 0.3498                         |

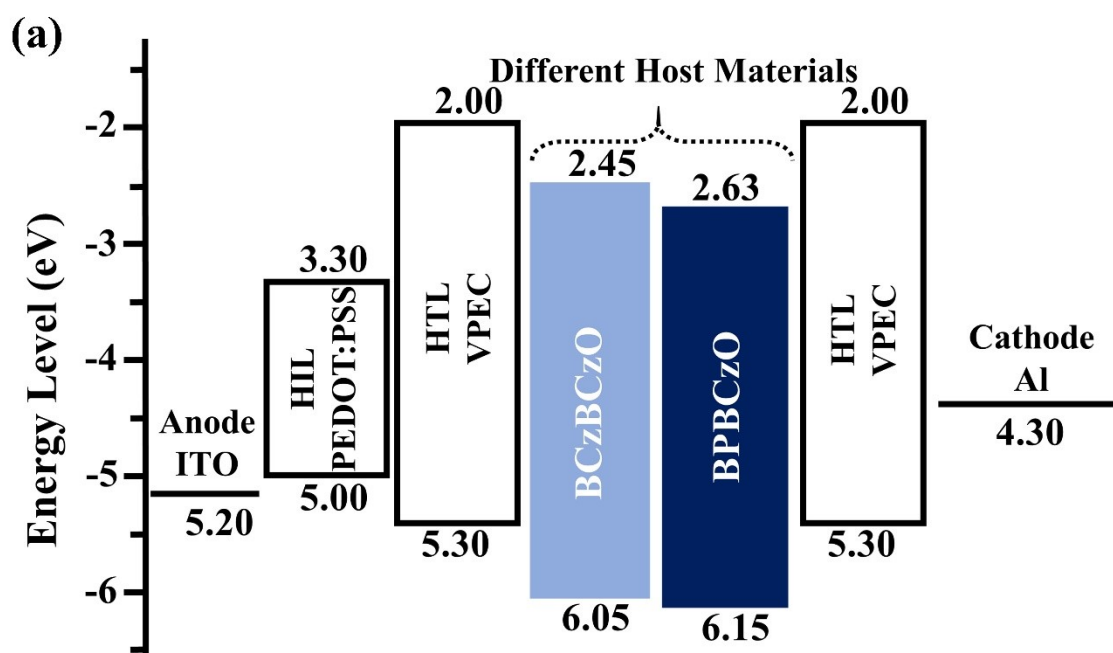

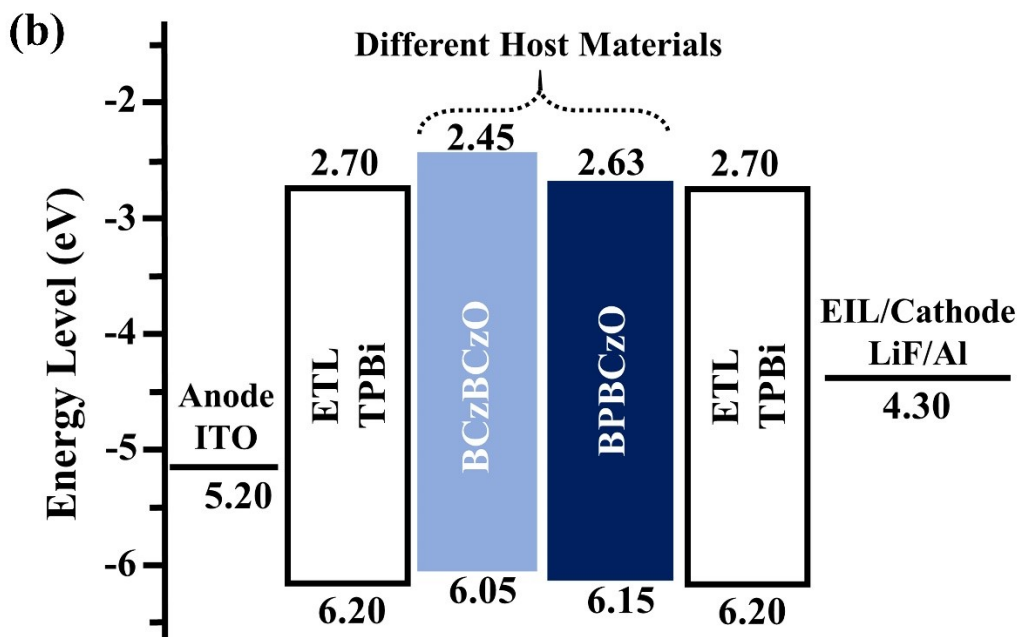

Figure S8. Schematic diagram of single carrier devices such as (a) hole-only device and (b) electron-only device fabricated with newly synthesized host materials, i.e. **BPBCzO** and **BCzBCzO**. VPEC and TPBi were used as an electron blocking layer and hole blocking layer in hole-only devices and electron-only devices, respectively.

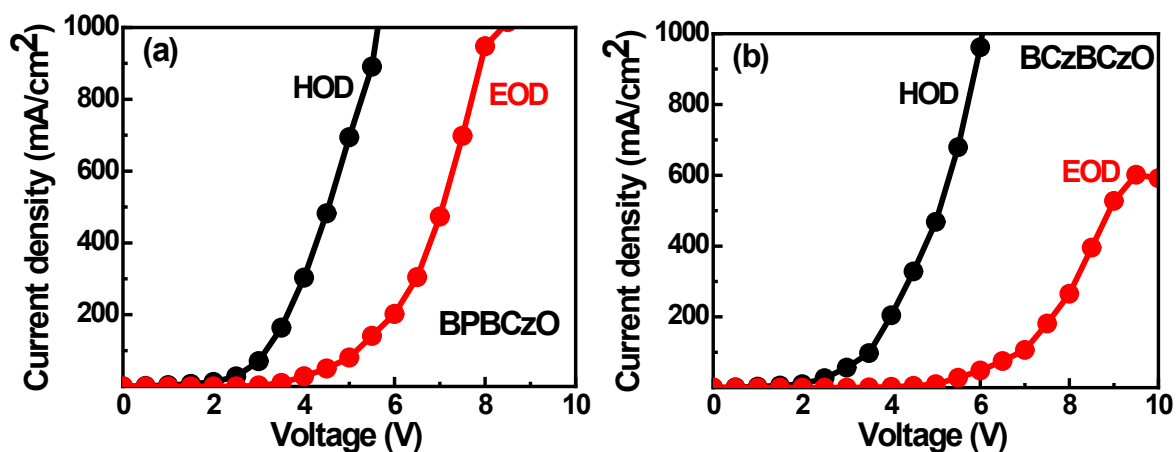

Figure S9. Current density characteristics of hole-only (black line plots) and electron-only devices (red line plots) fabricated with (a) **BPBCzO** and (b) **BCzBCzO**.

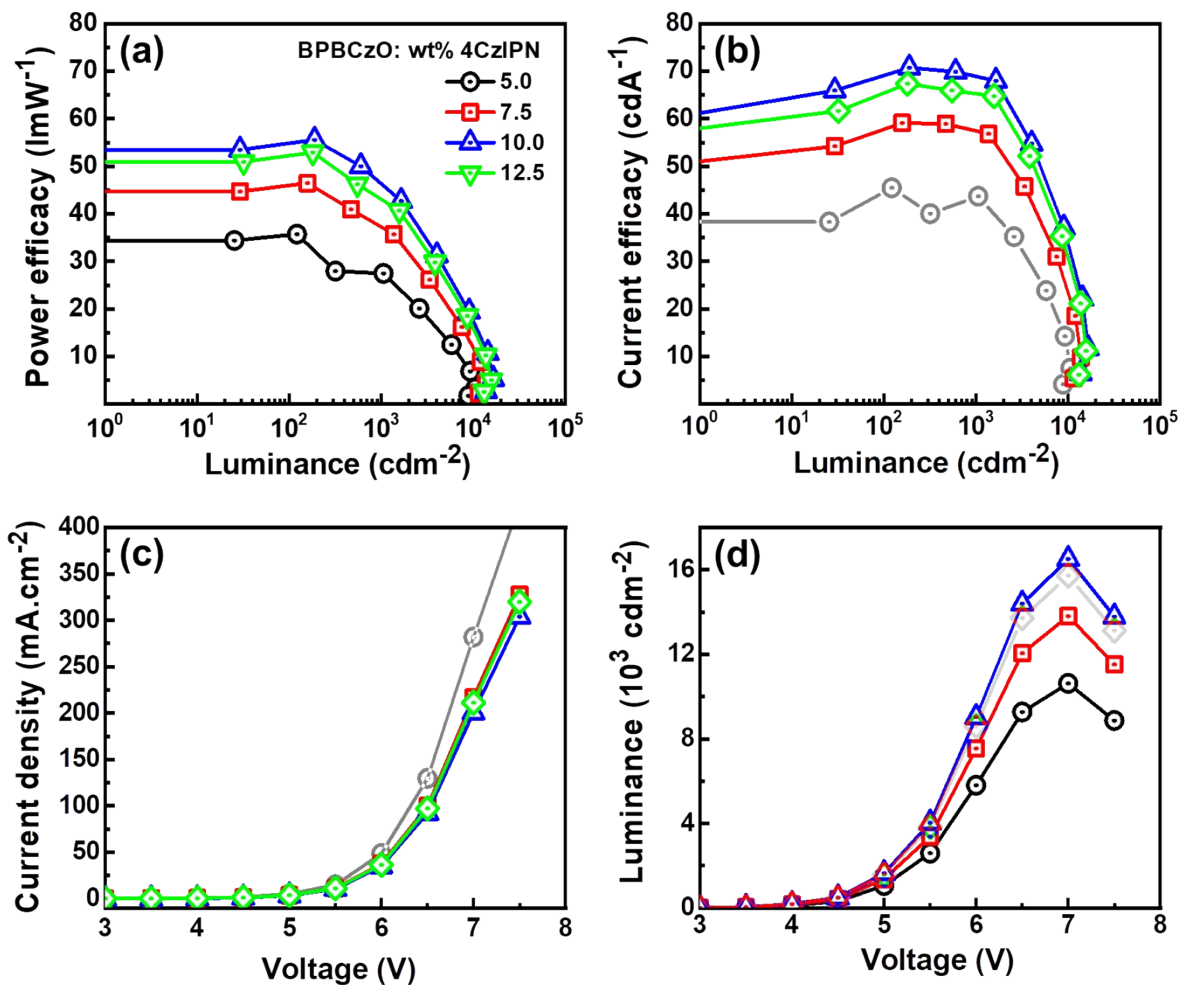

**Figure S10.** Effects of doping concentration on (a) power efficacy vs luminance, (b) current efficacy vs luminance, (c) current density vs voltage, and (d) luminance vs voltage results of the BPBCzO based green TADF OLED.

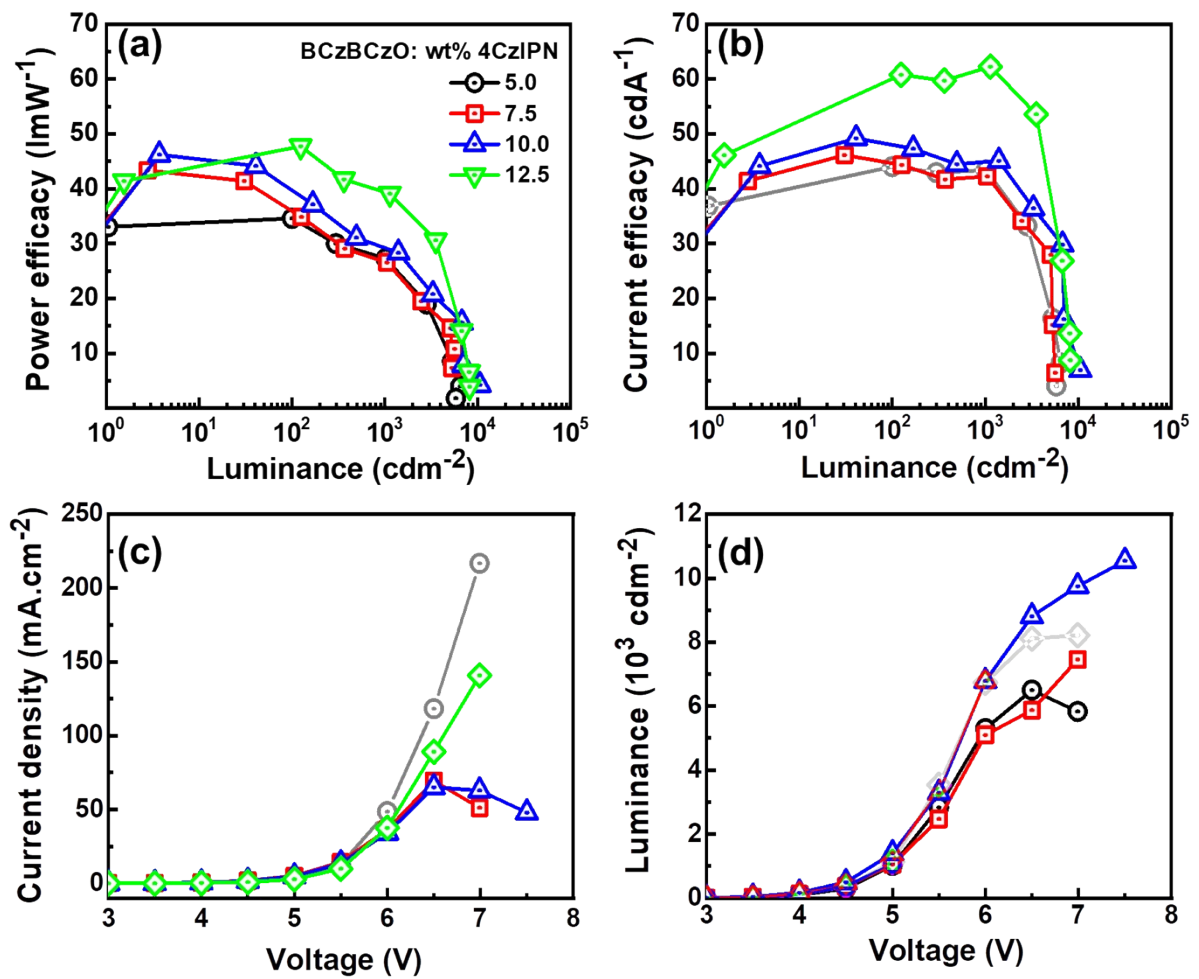

**Figure S11.** Effects of doping concentration on (a) power efficacy vs luminance, (b) current efficacy vs luminance, (c) current density vs voltage, and (d) luminance vs voltage results of the BCzBCzO based green TADF OLED.

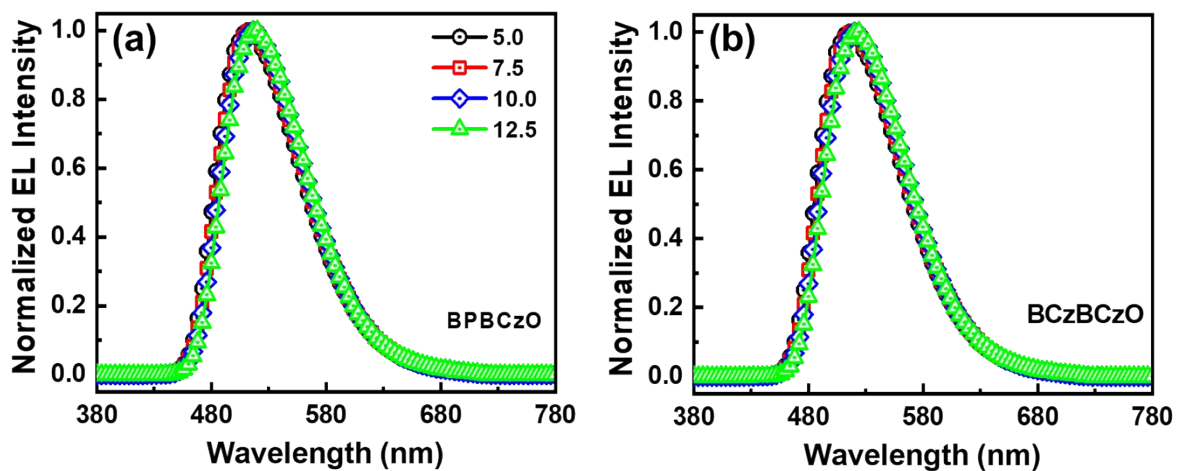

**Figure S12.** Effects of doping concentration on EL spectra of (a) BPBCzO and (d) BCzBCzO based green TADF organic LEDs.



**Table S1:** Carbazole-benzophenone derivatives-based green TADF organic LED performance at various dopant concentrations.

| Hosts   | Dopant Concen. (wt%) | V <sub>on</sub> (V) | Power efficacy (lm W <sup>-1</sup> ) |                       |                         | Current efficacy (cd A <sup>-1</sup> ) |                       |                         | External quantum efficiency (%) |                       |                         | CIE <sub>xy</sub> @100 cdm <sup>-2</sup> | L <sub>max</sub> cdm <sup>-2</sup> |
|---------|----------------------|---------------------|--------------------------------------|-----------------------|-------------------------|----------------------------------------|-----------------------|-------------------------|---------------------------------|-----------------------|-------------------------|------------------------------------------|------------------------------------|
|         |                      |                     | Max.                                 | 100 cdm <sup>-2</sup> | 1,000 cdm <sup>-2</sup> | Max.                                   | 100 cdm <sup>-2</sup> | 1,000 cdm <sup>-2</sup> | Max.                            | 100 cdm <sup>-2</sup> | 1,000 cdm <sup>-2</sup> |                                          |                                    |
| BCzBCzO | 5.0                  | 3.5                 | 34.6                                 | 34.6                  | 27.4                    | 44.0                                   | 44.0                  | 43.4                    | 9.3                             | 9.3                   | 9.0                     | (0.26,0.56)                              | 6,501                              |
|         | 7.5                  | 3.3                 | 43.3                                 | 36.7                  | 26.8                    | 46.1                                   | 44.8                  | 42.2                    | 14.3                            | 14.0                  | 13.1                    | (0.28,0.57)                              | 7,900                              |
|         | 10.0                 | 2.7                 | 46.2                                 | 40.9                  | 29.5                    | 49.2                                   | 48.3                  | 44.8                    | 15.3                            | 15.0                  | 14.0                    | (0.29,0.57)                              | 10,540                             |
|         | 12.5                 | 3.0                 | 47.7                                 | 46.5                  | 39.6                    | 62.3                                   | 57.9                  | 61.8                    | 13.3                            | 12.2                  | 13.2                    | (0.29,0.57)                              | 8,213                              |
| BPBCzO  | 5.0                  | 3.0                 | 35.7                                 | 35.4                  | 27.5                    | 45.4                                   | 43.8                  | 43.4                    | 14.2                            | 13.7                  | 13.6                    | (0.27,0.57)                              | 10,620                             |
|         | 7.5                  | 3.0                 | 46.4                                 | 45.6                  | 35.9                    | 59.1                                   | 54.8                  | 54.9                    | 18.4                            | 17.1                  | 17.2                    | (0.28,0.57)                              | 13,800                             |
|         | 10.0                 | 3.0                 | 55.6                                 | 54.3                  | 43.1                    | 70.7                                   | 64.1                  | 64.8                    | 23.2                            | 21.0                  | 21.3                    | (0.28,0.57)                              | 16,500                             |
|         | 12.5                 | 3.1                 | 52.9                                 | 51.8                  | 41.0                    | 67.4                                   | 61.4                  | 61.9                    | 21.0                            | 19.1                  | 19.3                    | (0.28,0.57)                              | 15,720                             |

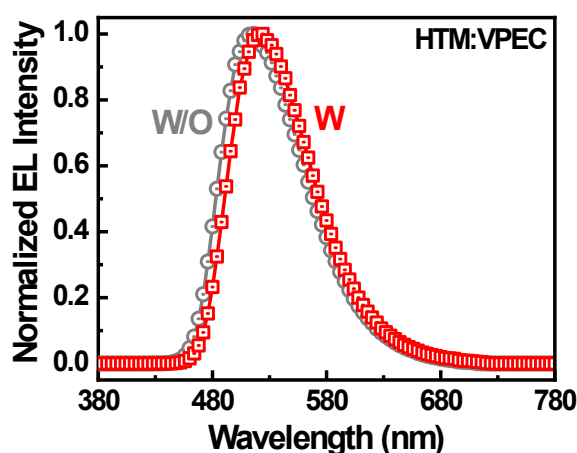

**Figure S13.** EL spectra of BPBCzO based TADF organic LEDs fabricated with (red line) and without (grey line) VPEC.

#### Cartesian coordinates of the optimized structures of BPBCzO

|   |             |              |              |
|---|-------------|--------------|--------------|
| 6 | 7.662807617 | -3.595291164 | -2.053823890 |
| 6 | 8.723133724 | -2.677605404 | -1.990359371 |
| 6 | 8.535335968 | -1.417856566 | -1.433928102 |
| 6 | 7.275948568 | -1.078707121 | -0.929558275 |

|   |              |              |              |
|---|--------------|--------------|--------------|
| 6 | 6.220357063  | -2.021314282 | -0.988021111 |
| 6 | 6.400380041  | -3.282347350 | -1.559155734 |
| 6 | 6.737131720  | 0.118370279  | -0.318269138 |
| 6 | 5.374043095  | -0.140719097 | -0.038838473 |
| 7 | 5.064850395  | -1.443424066 | -0.444445216 |
| 6 | 7.293310873  | 1.353993053  | 0.015860606  |
| 6 | 6.506255126  | 2.333204071  | 0.630057091  |
| 6 | 5.152714599  | 2.038826514  | 0.908540090  |
| 6 | 4.575326673  | 0.817052567  | 0.587393054  |
| 6 | 3.799272976  | -2.071982088 | -0.327221849 |
| 6 | 2.656892999  | -1.455967498 | -0.846604587 |
| 6 | 1.414667997  | -2.065786455 | -0.712843221 |
| 6 | 1.295274497  | -3.314039172 | -0.088045147 |
| 6 | 2.452057699  | -3.936756818 | 0.401796579  |
| 6 | 3.688409850  | -3.317314588 | 0.305039819  |
| 6 | -0.000007643 | -4.058706789 | -0.000558184 |
| 8 | -0.000003854 | -5.282369328 | -0.000893840 |
| 6 | -1.295231597 | -3.314035568 | 0.087408965  |
| 6 | -1.414408060 | -2.065734579 | 0.712154428  |
| 6 | -2.656573260 | -1.455878692 | 0.846270628  |
| 6 | -3.799150307 | -2.071910983 | 0.327338209  |
| 6 | -3.688518395 | -3.317315091 | -0.304841603 |
| 6 | -2.452207647 | -3.936765364 | -0.401989426 |
| 7 | -5.064643667 | -1.443294132 | 0.444950592  |

|   |              |              |              |
|---|--------------|--------------|--------------|
| 6 | -5.373961231 | -0.140661652 | 0.039143754  |
| 6 | -6.737082242 | 0.118316959  | 0.318502747  |
| 6 | -7.275811722 | -1.078752318 | 0.929882777  |
| 6 | -6.220139095 | -2.021254268 | 0.988479309  |
| 6 | -4.575309506 | 0.817114999  | -0.587149278 |
| 6 | -5.152807899 | 2.038801976  | -0.908447780 |
| 6 | -6.506377472 | 2.333075952  | -0.630017858 |
| 6 | -7.293366331 | 1.353861060  | -0.015747221 |
| 6 | -8.535180496 | -1.417941012 | 1.434270988  |
| 6 | -8.722884534 | -2.677640468 | 1.990845558  |
| 6 | -7.662478152 | -3.595224853 | 2.054445683  |
| 6 | -6.400063328 | -3.282227771 | 1.559780163  |
| 6 | 7.080020427  | 3.655254265  | 0.992391136  |
| 6 | 8.386804751  | 3.763408554  | 1.494266829  |
| 6 | 8.925770033  | 5.002164471  | 1.831702544  |
| 6 | 8.169700048  | 6.163602909  | 1.678892447  |
| 6 | 6.869741210  | 6.072856842  | 1.183499451  |
| 6 | 6.332050981  | 4.834101788  | 0.843488712  |
| 6 | -7.080244427 | 3.655038536  | -0.992484911 |
| 6 | -6.332447494 | 4.833975801  | -0.843453172 |
| 6 | -6.870236414 | 6.072654750  | -1.183587241 |
| 6 | -8.170117146 | 6.163217932  | -1.679223220 |
| 6 | -8.926013031 | 5.001681507  | -1.832155075 |
| 6 | -8.386948000 | 3.762999341  | -1.494602295 |

|   |              |              |              |
|---|--------------|--------------|--------------|
| 1 | 7.826525427  | -4.569560731 | -2.499973678 |
| 1 | 9.694014429  | -2.954485356 | -2.384164433 |
| 1 | 9.352293828  | -0.705997593 | -1.395758822 |
| 1 | 5.589612179  | -3.996262080 | -1.623087976 |
| 1 | 8.331782700  | 1.559384841  | -0.217091375 |
| 1 | 4.546378217  | 2.781325341  | 1.413726268  |
| 1 | 3.539918068  | 0.620027902  | 0.833331520  |
| 1 | 2.745489659  | -0.511826885 | -1.368855985 |
| 1 | 0.543686421  | -1.582387721 | -1.136511708 |
| 1 | 2.363110889  | -4.906631070 | 0.874668243  |
| 1 | 4.569291237  | -3.787302447 | 0.723736075  |
| 1 | -0.543292703 | -1.582319229 | 1.135528226  |
| 1 | -2.744971531 | -0.511702214 | 1.368493758  |
| 1 | -4.569549957 | -3.787355454 | -0.723162468 |
| 1 | -2.363425162 | -4.906683210 | -0.874800675 |
| 1 | -3.539874813 | 0.620163901  | -0.833042552 |
| 1 | -4.546534435 | 2.781315329  | -1.413691692 |
| 1 | -8.331867104 | 1.559189352  | 0.217140488  |
| 1 | -9.352190321 | -0.706147001 | 1.396006038  |
| 1 | -9.693748835 | -2.954557567 | 2.384664569  |
| 1 | -7.826114944 | -4.569453721 | 2.500713849  |
| 1 | -5.589237257 | -3.996066396 | 1.623833444  |
| 1 | 8.978354482  | 2.867072312  | 1.642532038  |
| 1 | 9.935224373  | 5.058467427  | 2.223856615  |

|   |              |             |              |
|---|--------------|-------------|--------------|
| 1 | 8.588509338  | 7.127875513 | 1.943213065  |
| 1 | 6.274186507  | 6.969612250 | 1.052772615  |
| 1 | 5.327968531  | 4.782960141 | 0.437877162  |
| 1 | -5.328433202 | 4.782949033 | -0.437653749 |
| 1 | -6.274830516 | 6.969495302 | -1.052767064 |
| 1 | -8.589001950 | 7.127431745 | -1.943639957 |
| 1 | -9.935403129 | 5.057856297 | -2.224492649 |
| 1 | -8.978345698 | 2.866571272 | -1.642938505 |

**Cartesian coordinates of the optimized structure of BCzBCzO**

|   |              |              |             |
|---|--------------|--------------|-------------|
| 6 | 9.760234188  | 5.107380604  | 0.161672167 |
| 6 | 8.334186964  | 5.386952691  | 1.900496867 |
| 6 | 7.362125136  | 5.221925877  | 2.889456182 |
| 6 | 7.181437194  | 6.258829096  | 3.799259773 |
| 6 | -7.403263322 | -6.594233278 | 2.886645669 |
| 6 | -8.452069557 | -5.663304820 | 2.947827634 |
| 6 | -8.312939598 | -4.403638163 | 2.377385334 |
| 6 | -7.115314591 | -4.078362613 | 1.732939505 |
| 6 | -6.072449323 | -5.034441928 | 1.666182785 |
| 6 | -6.202159821 | -6.295546853 | 2.250623141 |
| 6 | -6.633297672 | -2.883715286 | 1.071553089 |
| 6 | -5.315142545 | -3.159152261 | 0.635507961 |
| 7 | -4.979234845 | -4.467698672 | 0.995778706 |
| 6 | -7.203523253 | -1.635648432 | 0.818365800 |

|   |              |              |              |
|---|--------------|--------------|--------------|
| 6 | -6.475333712 | -0.660447349 | 0.129097679  |
| 6 | -5.169243726 | -0.972814964 | -0.310486437 |
| 6 | -4.579424817 | -2.206915132 | -0.071450194 |
| 6 | -3.736964154 | -5.103670002 | 0.744228713  |
| 6 | -2.542906061 | -4.489463097 | 1.133199719  |
| 6 | -1.324348575 | -5.102324034 | 0.865281856  |
| 6 | -1.276914534 | -6.352003451 | 0.233703848  |
| 6 | -2.482131382 | -6.974126027 | -0.121406188 |
| 6 | -3.699404952 | -6.351716954 | 0.109032833  |
| 6 | 0.000048076  | -7.097029401 | 0.000045640  |
| 8 | 0.000046068  | -8.320615208 | 0.000078162  |
| 6 | 1.277006748  | -6.352013082 | -0.233657663 |
| 6 | 1.324433074  | -5.102326220 | -0.865219460 |
| 6 | 2.542987316  | -4.489463177 | -1.133153639 |
| 6 | 3.737049648  | -5.103682475 | -0.744221749 |
| 6 | 3.699499569  | -6.351738068 | -0.109038984 |
| 6 | 2.482230370  | -6.974144918 | 0.121419369  |
| 7 | 4.979321752  | -4.467709536 | -0.995763942 |
| 6 | 5.315229171  | -3.159170375 | -0.635490414 |
| 6 | 6.633356093  | -2.883701676 | -1.071605170 |
| 6 | 7.115349358  | -4.078326163 | -1.733053220 |
| 6 | 6.072499648  | -5.034420412 | -1.666260584 |
| 6 | 4.579548571  | -2.206957244 | 0.071539816  |
| 6 | 5.169370855  | -0.972859113 | 0.310574484  |

|   |              |              |              |
|---|--------------|--------------|--------------|
| 6 | 6.475432086  | -0.660459076 | -0.129076908 |
| 6 | 7.203586278  | -1.635639732 | -0.818414955 |
| 6 | 8.312942138  | -4.403572830 | -2.377572752 |
| 6 | 8.452055746  | -5.663224385 | -2.948052487 |
| 6 | 7.403264328  | -6.594166602 | -2.886834654 |
| 6 | 6.202193213  | -6.295510287 | -2.250736411 |
| 6 | -7.059317690 | 0.677692209  | -0.139209795 |
| 6 | -8.420312043 | 0.829540827  | -0.448425786 |
| 6 | -8.969087266 | 2.081897224  | -0.699273444 |
| 6 | -8.168019170 | 3.224400848  | -0.635755542 |
| 6 | -6.812675477 | 3.093797786  | -0.324947167 |
| 6 | -6.268821073 | 1.836736041  | -0.087520930 |
| 6 | 7.059409661  | 0.677676397  | 0.139234455  |
| 6 | 6.268872827  | 1.836701914  | 0.087735019  |
| 6 | 6.812719928  | 3.093763829  | 0.325179798  |
| 6 | 8.168101298  | 3.224390783  | 0.635808978  |
| 6 | 8.969213792  | 2.081908945  | 0.699138821  |
| 6 | 8.420443755  | 0.829553745  | 0.448278517  |
| 7 | -8.727084032 | 4.509846349  | -0.886983293 |
| 7 | 8.727131023  | 4.509844862  | 0.887057251  |
| 6 | -9.760384527 | 5.107205017  | -0.161738383 |
| 6 | -8.334130977 | 5.387039794  | -1.900353142 |
| 6 | -9.124315961 | 6.561912825  | -1.826002437 |
| 6 | -8.921557835 | 7.589571391  | -2.753268580 |

|   |               |              |              |
|---|---------------|--------------|--------------|
| 6 | -7.948521421  | 7.433748430  | -3.733632290 |
| 6 | -7.181253410  | 6.259163536  | -3.798929482 |
| 6 | -7.361915634  | 5.222197043  | -2.889192482 |
| 6 | -10.453218149 | 4.630352629  | 0.953165803  |
| 6 | -11.437680135 | 5.446166990  | 1.501628986  |
| 6 | -11.728603265 | 6.709114060  | 0.960323539  |
| 6 | -11.030295464 | 7.183418751  | -0.144027998 |
| 6 | -10.034654979 | 6.383611525  | -0.714931762 |
| 6 | 7.948532216   | 7.433525540  | 3.733906933  |
| 6 | 8.921412841   | 7.589530856  | 2.753417771  |
| 6 | 9.124188959   | 6.561942141  | 1.826076606  |
| 6 | 10.034398010  | 6.383806315  | 0.714873721  |
| 6 | 11.029835344  | 7.183782031  | 0.143851580  |
| 6 | 11.728052815  | 6.709617519  | -0.960617355 |
| 6 | 11.437240230  | 5.446644573  | -1.501921372 |
| 6 | 10.452978643  | 4.630663770  | -0.953343755 |
| 1 | 6.768772180   | 4.318425496  | 2.951018949  |
| 1 | 6.432389496   | 6.154243615  | 4.576080581  |
| 1 | -7.527131386  | -7.568131987 | 3.346220927  |
| 1 | -9.374772801  | -5.929829916 | 3.449691288  |
| 1 | -9.119426363  | -3.681294940 | 2.435506903  |
| 1 | -5.398967449  | -7.020149366 | 2.220046549  |
| 1 | -8.202820988  | -1.416823204 | 1.176486656  |
| 1 | -4.612987778  | -0.234947150 | -0.876289637 |



|   |               |              |              |
|---|---------------|--------------|--------------|
| 1 | -3.583220420  | -2.417073421 | -0.438328399 |
| 1 | -2.571453046  | -3.543471990 | 1.658720930  |
| 1 | -0.411669876  | -4.619649776 | 1.190318366  |
| 1 | -2.447779063  | -7.945703658 | -0.597963655 |
| 1 | -4.621436162  | -6.821056480 | -0.209688751 |
| 1 | 0.411750593   | -4.619642902 | -1.190231305 |
| 1 | 2.571521056   | -3.543463016 | -1.658658577 |
| 1 | 4.621536759   | -6.821079923 | 0.209661357  |
| 1 | 2.447881284   | -7.945726889 | 0.597968000  |
| 1 | 3.583370039   | -2.417129360 | 0.438480489  |
| 1 | 4.613136303   | -0.235022339 | 0.876438812  |
| 1 | 8.202860464   | -1.416802545 | -1.176594561 |
| 1 | 9.119417367   | -3.681218993 | -2.435723072 |
| 1 | 9.374733854   | -5.929726144 | -3.449974631 |
| 1 | 7.527119638   | -7.568053404 | -3.346438620 |
| 1 | 5.399011953   | -7.020123330 | -2.220131980 |
| 1 | -9.053678048  | -0.046038814 | -0.527912699 |
| 1 | -10.015737157 | 2.175085592  | -0.962977247 |
| 1 | -6.191533572  | 3.978455943  | -0.252376559 |
| 1 | -5.220667848  | 1.760471492  | 0.176391063  |
| 1 | 5.220687258   | 1.760436852  | -0.176047499 |
| 1 | 6.191532831   | 3.978406020  | 0.252772227  |
| 1 | 10.015896651  | 2.175106240  | 0.962707679  |
| 1 | 9.053854529   | -0.046006029 | 0.527624981  |

|   |               |             |              |
|---|---------------|-------------|--------------|
| 1 | -9.517748292  | 8.494342035 | -2.709615061 |
| 1 | -7.780364237  | 8.222672014 | -4.457468279 |
| 1 | -6.432084479  | 6.154714848 | -4.575651842 |
| 1 | -6.768423717  | 4.318786919 | -2.950724292 |
| 1 | -10.233136188 | 3.660232241 | 1.380525476  |
| 1 | -11.989642962 | 5.097362918 | 2.367121565  |
| 1 | -12.502885256 | 7.318450550 | 1.411750522  |
| 1 | -11.252093705 | 8.161890609 | -0.555511533 |
| 1 | 7.780362756   | 8.222394937 | 4.457799189  |
| 1 | 9.517463700   | 8.494391513 | 2.709718272  |
| 1 | 11.251544154  | 8.162272887 | 0.555337952  |
| 1 | 12.502176846  | 7.319083922 | -1.412139726 |
| 1 | 11.989135058  | 5.097952295 | -2.367502441 |
| 1 | 10.232979817  | 3.660526051 | -1.380705576 |

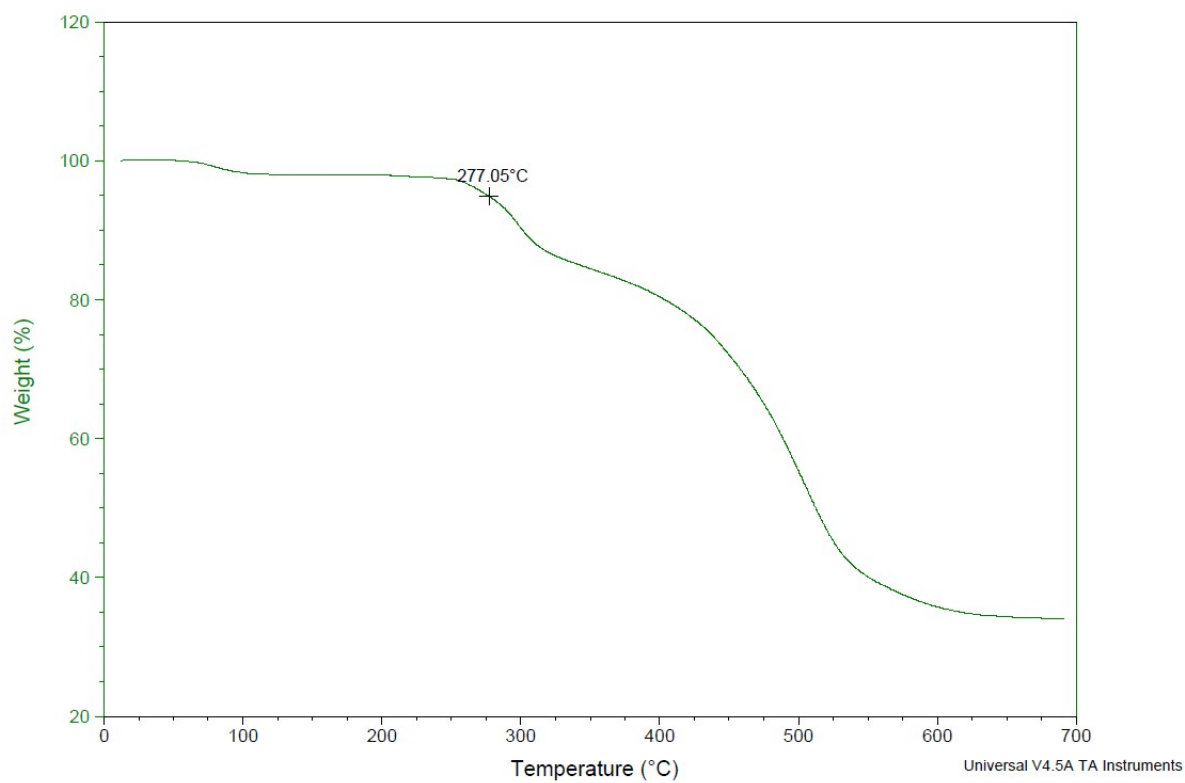

**Figure S14.** TGA curve of compound **BPBCzO**

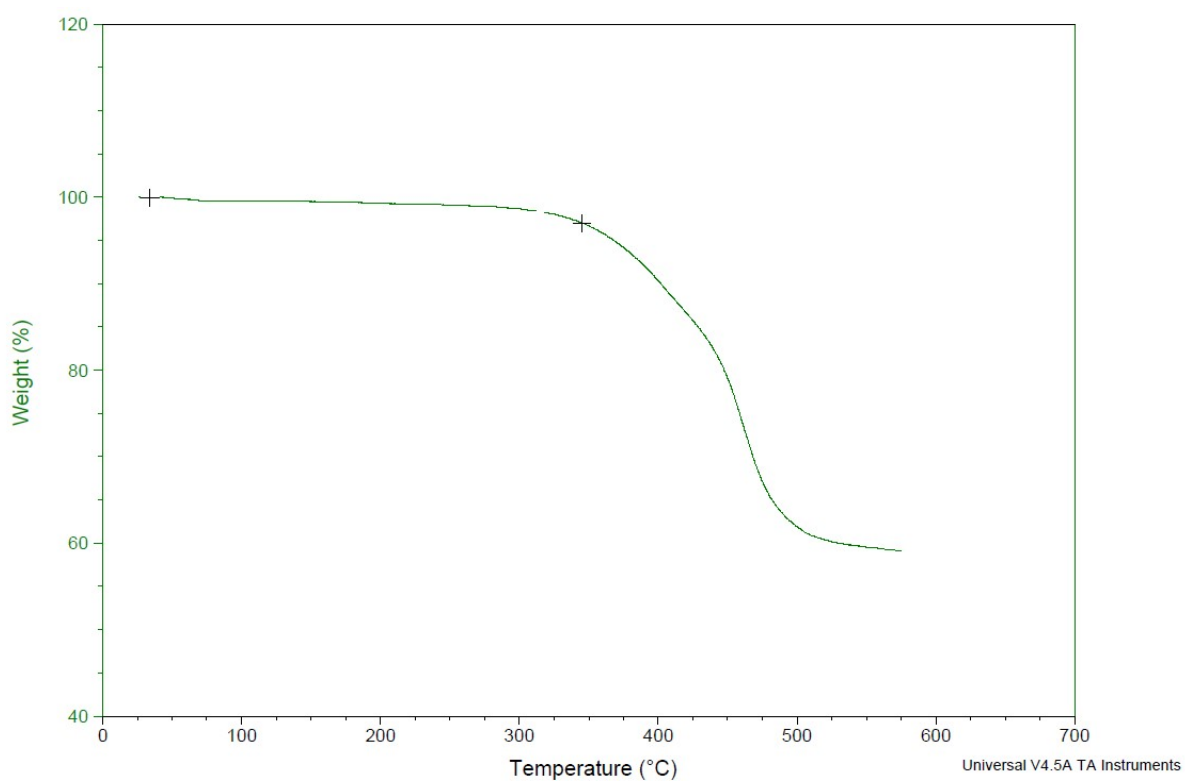

**Figure S15.** TGA curve of compound **BCzBCzO**

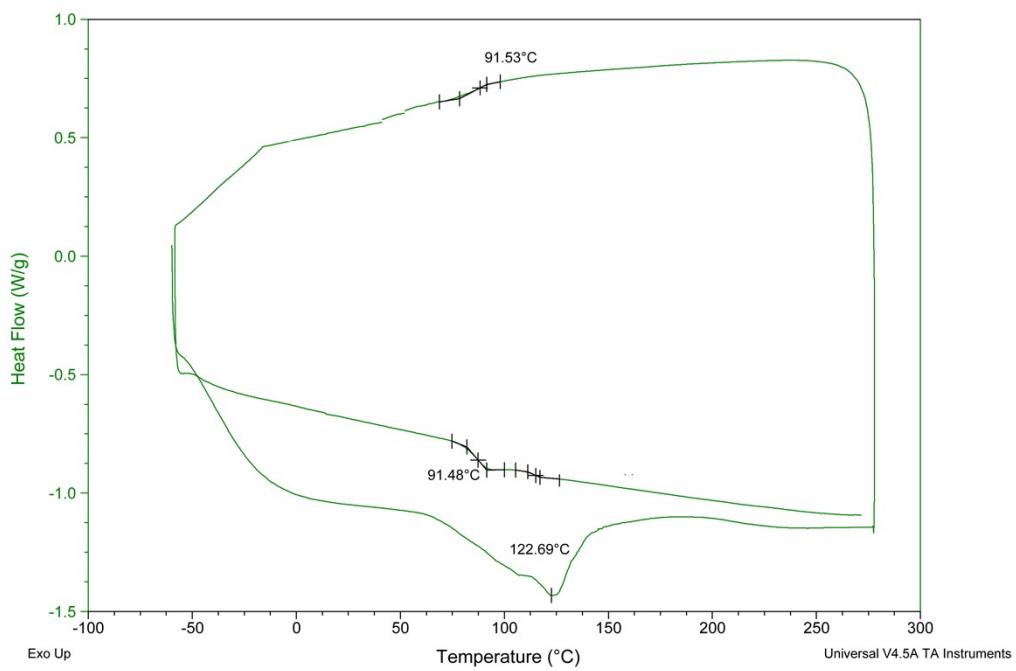

**Figure S16.** DSC curves of compound **BPBCzO**. Heating rate: 10 °C/min.
